# Supplementary material for: Revealing propionate metabolism-related genes in glioblastoma and investigating their underlying mechanisms
Source: Front Oncol. 2025 Apr 17;15:1529369. doi: 10.3389/fonc.2025.1529369 (PMC12043635; doi:10.3389/fonc.2025.1529369)
Supplement: Supplementary file 11 [file Table8.xlsx]

## Sheet: KEGG
ID	Description	setSize	enrichmentScore	NES	pvalue	p.adjust	qvalues	rank	leading_edge	core_enrichment
KEGG_CYTOKINE_CYTOKINE_RECEPTOR_INTERACTION	KEGG_CYTOKINE_CYTOKINE_RECEPTOR_INTERACTION	264	0.602621	2.45344	1e-10	9.3e-09	6.21053e-09	6060	tags=50%, list=16%, signal=42%	6374/9547/6354/8740/970/2921/6372/6347/2920/4982/85480/53832/60401/4233/8784/23529/8200/10563/3976/3559/9560/3576/2919/58985/414062/5008/8744/9180/51330/1950/3586/1440/3577/3600/3625/7422/2833/1489/338376/6351/3569/6348/4352/8807/3552/3581/729230/8794/5154/10663/1233/3554/55540/6364/3574/3606/7292/3553/3589/2056/608/8718/6352/64806/8764/2826/50615/3575/355/1234/8809/1441/8741/6368/7132/6370/3456/…
KEGG_HEMATOPOIETIC_CELL_LINEAGE	KEGG_HEMATOPOIETIC_CELL_LINEAGE	85	0.675165	2.37014	1e-10	9.3e-09	6.21053e-09	5867	tags=65%, list=15%, signal=55%	3675/1378/3559/960/4311/1440/915/3569/914/7066/3552/3581/3554/924/3574/917/926/3553/3589/2056/929/2208/3575/3684/912/1441/931/916/3674/3122/2323/2209/7850/3673/945/3127/2814/3690/928/3570/951/2815/1380/921/3123/1435/2057/911/1437/290/3678/7124/1436/3565/948
KEGG_RIBOSOME	KEGG_RIBOSOME	88	-0.609951	-2.12688	1.8329e-08	9.09811e-07	6.07571e-07	12162	tags=86%, list=32%, signal=59%	6209/6164/6193/6231/6203/6222/6141/6169/6160/6171/2197/6194/6218/6154/6227/6204/6166/51187/6223/4736/6134/6189/6147/6152/6136/6224/6132/7311/6165/28998/6234/6230/6233/6137/6175/6232/6155/6133/6210/6168/6206/6202/6159/6188/6144/6201/23521/6205/6130/6139/6143/6191/6135/6228/6217/6170/6173/6167/6235/6192/9349/6128/9045/6125/6187/6161/6129/6142/6124/3921/6138/6122/6229/6156/6146/284288
KEGG_COMPLEMENT_AND_COAGULATION_CASCADES	KEGG_COMPLEMENT_AND_COAGULATION_CASCADES	69	0.661223	2.25143	1.95658e-08	9.09811e-07	6.07571e-07	3709	tags=49%, list=10%, signal=45%	624/629/729/1378/3426/716/5328/2266/728/2162/715/730/710/722/5054/5329/623/5627/718/2152/733/5327/5265/1675/727/7056/3818/5104/2161/725/721/712/713/2157
KEGG_ECM_RECEPTOR_INTERACTION	KEGG_ECM_RECEPTOR_INTERACTION	84	0.6059	2.12357	2.27272e-07	8.45453e-06	5.64592e-06	4513	tags=43%, list=12%, signal=38%	7148/3691/6385/1292/3675/3381/960/51206/1289/1277/6383/3909/3679/284217/3693/1278/1293/6696/1291/3918/7448/7057/6382/3371/3696/3674/1281/3673/2814/3690/3694/9899/50509/3913/2815/3908
KEGG_SPLICEOSOME	KEGG_SPLICEOSOME	127	-0.5181	-1.89087	1.12495e-06	3.48735e-05	2.32885e-05	11281	tags=68%, list=30%, signal=48%	10946/9775/11338/6431/10569/10594/29896/6434/25949/4686/22916/5093/6429/7307/51503/6632/11017/10772/6626/1655/6428/8175/23020/153527/9410/6432/51639/9939/6629/9343/9716/1659/22938/23450/51729/27258/58517/51340/120364/3183/22985/1665/23350/51690/55119/51645/6635/988/144983/6426/10713/56949/10523/10907/84321/22827/10992/3190/84950/23451/56259/10929/27316/10084/10285/55660/3312/57187/27339/24148/113…
KEGG_CELL_CYCLE	KEGG_CELL_CYCLE	125	-0.486152	-1.7772	2.9589e-05	0.000786222	0.000525038	11212	tags=59%, list=29%, signal=42%	23595/7534/51433/545/472/4088/25847/10459/902/991/10926/890/8556/7532/1028/1869/8379/51434/5347/699/1027/996/896/7709/5591/25/8697/5000/4089/27127/51343/1875/8243/8317/7529/1021/9088/5933/5934/23594/4998/7533/64682/1871/4174/9184/701/4087/1387/995/10735/10971/1032/1870/7272/5885/4085/983/9978/10274/2932/4609/11200/8318/9126/5925/993/595/2033/3066/10912/1019/894/85417
KEGG_ALLOGRAFT_REJECTION	KEGG_ALLOGRAFT_REJECTION	35	0.685713	2.06975	4.07116e-05	0.000946545	0.000632101	6563	tags=63%, list=17%, signal=52%	3586/5551/3002/355/3122/3108/356/3127/3109/3111/942/3112/959/3119/3123/958/3118/3115/7124/3565/3113/3134
KEGG_INTESTINAL_IMMUNE_NETWORK_FOR_IGA_PRODUCTION	KEGG_INTESTINAL_IMMUNE_NETWORK_FOR_IGA_PRODUCTION	46	0.624964	1.96964	9.01771e-05	0.00169963	0.00113501	6538	tags=67%, list=17%, signal=56%	29851/3586/3600/3569/608/2826/9020/8741/6370/3122/3108/3127/3109/7852/3111/942/23308/3112/959/3119/3123/7040/958/3118/3115/57379/8174/3565/4055/3113/3695
KEGG_CELL_ADHESION_MOLECULES_CAMS	KEGG_CELL_ADHESION_MOLECULES_CAMS	131	0.459555	1.7202	0.000100516	0.00169963	0.00113501	6563	tags=47%, list=17%, signal=39%	1364/6385/137075/29851/23562/6383/9080/914/50848/5133/1365/3383/80380/965/29126/926/9076/9071/3684/6382/3385/6402/3696/4267/1366/3122/4897/3108/1002/3689/257194/3127/6900/5792/3109/3111/923/1493/942/23308/5010/6403/149461/3112/959/3119/3123/958/5819/3118/8506/7412/3115/10686/8174/3113/57863/24146/10666/3695/3134
KEGG_GRAFT_VERSUS_HOST_DISEASE	KEGG_GRAFT_VERSUS_HOST_DISEASE	37	0.658109	1.97779	0.000100516	0.00169963	0.00113501	6563	tags=59%, list=17%, signal=49%	5551/3569/3552/3553/3002/355/3802/3122/3108/356/3127/3109/3111/942/3112/3119/3123/3118/3115/7124/3113/3134
KEGG_SYSTEMIC_LUPUS_ERYTHEMATOSUS	KEGG_SYSTEMIC_LUPUS_ERYTHEMATOSUS	135	0.458647	1.73014	0.000113025	0.00175189	0.00116991	6804	tags=39%, list=18%, signal=32%	729/2213/716/1991/715/730/8355/9103/3586/8331/718/2903/733/2215/1511/8360/727/2212/55766/3122/87/2209/721/3108/3127/712/8970/713/3109/3111/121504/942/714/2214/717/8969/3112/959/3119/3123/958/3118/3115/8347/8290/8968/7124/3113/8361/8356/8368/8370/8359
KEGG_PROGESTERONE_MEDIATED_OOCYTE_MATURATION	KEGG_PROGESTERONE_MEDIATED_OOCYTE_MATURATION	85	-0.507145	-1.7501	0.000166114	0.00237671	0.00158716	12662	tags=61%, list=33%, signal=41%	8881/891/5291/245711/196883/5604/5595/6197/51433/2773/207/25847/115/673/10459/890/51434/1432/5347/699/996/8697/51343/9088/5601/3326/3320/5296/64682/5894/113/995/5567/6300/6196/4085/983/5613/108/5295/3845/5290/27330/993/10000/5594/2770/8503/5599/111/5140/85417
KEGG_PARKINSONS_DISEASE	KEGG_PARKINSONS_DISEASE	117	-0.46394	-1.69027	0.000210717	0.00279952	0.00186952	13500	tags=66%, list=35%, signal=43%	4710/516/4729/7416/291/515/374291/6392/4718/4725/7054/10975/390424/7419/5481/7327/9246/4702/7384/1340/170712/65018/517/9377/293/4716/513/54205/6391/6570/1345/4705/4724/1351/4706/292/5071/4704/83447/7326/6389/1349/4715/9167/1347/842/6390/4711/4714/7381/4720/7388/7386/440567/1537/644310/7345/7385/7317/317/51465/4719/29796/498/506/518/6531/4700/7417/729317/341947/5413/509/7332/9627/6571/120892
KEGG_AMINOACYL_TRNA_BIOSYNTHESIS	KEGG_AMINOACYL_TRNA_BIOSYNTHESIS	41	-0.614974	-1.8692	0.000294271	0.00364896	0.00243677	9372	tags=73%, list=25%, signal=55%	80222/23438/5917/51067/3035/3376/10056/92935/23395/55157/1615/57038/55699/51520/6301/3735/2617/118672/2193/7407/124454/16/4677/8565/79731/2058/7453/123283/6897/4141
KEGG_RNA_DEGRADATION	KEGG_RNA_DEGRADATION	59	-0.549865	-1.78092	0.000352303	0.00409552	0.00273499	12380	tags=69%, list=33%, signal=47%	2023/4850/4849/9125/28960/10438/246175/27257/80153/10200/9652/25904/56915/11340/11044/3313/27258/5394/9337/51690/22803/167227/54464/64895/1656/54512/51013/22894/57472/3329/55802/23517/23019/84186/10914/87178/219988/23016/29883/23644/4848
KEGG_JAK_STAT_SIGNALING_PATHWAY	KEGG_JAK_STAT_SIGNALING_PATHWAY	155	0.418892	1.60964	0.000451268	0.0049374	0.00329719	5855	tags=34%, list=15%, signal=29%	9021/85480/53832/23624/23529/3976/3559/58985/5008/9180/3586/1440/3600/1489/338376/3569/4352/3581/3574/8651/3589/2056/50615/3575/10253/81848/1441/3456/8835/2690/163702/3718/3467/3597/5292/3570/64109/6775/3439/5777/1439/10252/50604/3560/23533/3588/2057/3443/3952/3587/1437/6778/3565
KEGG_WNT_SIGNALING_PATHWAY	KEGG_WNT_SIGNALING_PATHWAY	151	-0.424104	-1.59037	0.000646541	0.00668093	0.00446151	7049	tags=46%, list=19%, signal=38%	4089/4775/8326/5515/6477/1855/85409/5601/57680/5881/5533/80319/5530/8322/6093/7976/10725/5529/5331/7474/6885/5528/4087/5527/56998/59343/27101/5525/10297/324/1387/5567/818/5516/23291/64321/83439/144165/9978/5532/1857/1457/90665/2932/5613/7475/4609/5332/79718/81029/4041/23401/8945/10023/81839/1488/4040/595/7481/6934/2033/85407/80326/5599/23500/894/1454/23236/6425/6422
KEGG_INOSITOL_PHOSPHATE_METABOLISM	KEGG_INOSITOL_PHOSPHATE_METABOLISM	54	-0.536822	-1.70632	0.000736365	0.00720862	0.00481391	10527	tags=54%, list=28%, signal=39%	8394/4329/3705/3631/5298/3636/3612/4952/8867/84812/5335/5289/9562/5331/8396/5288/5728/23396/200576/5305/3628/5332/3632/79837/5290/253430/5297/5287/23236
KEGG_TYPE_I_DIABETES_MELLITUS	KEGG_TYPE_I_DIABETES_MELLITUS	41	0.594497	1.79862	0.00100198	0.00899928	0.00600971	6773	tags=56%, list=18%, signal=46%	5551/3552/3553/3002/355/5798/3122/3108/356/3127/3109/3111/942/2572/3112/3119/3123/3118/3115/7124/3113/3134/5799
KEGG_OOCYTE_MEIOSIS	KEGG_OOCYTE_MEIOSIS	113	-0.448477	-1.62127	0.00101605	0.00899928	0.00600971	10533	tags=50%, list=28%, signal=37%	5535/25847/115/10459/11261/5534/991/7532/51434/26271/801/6790/5526/5347/5519/699/5518/996/8697/5515/27127/8243/7529/9088/7533/64682/5533/808/5530/5529/113/5528/5527/9748/5525/995/5567/818/5516/10971/23291/6300/6196/5501/4085/983/9978/5532/367/151648/5613/108/8945/9126/27330/5594/111
KEGG_NOD_LIKE_RECEPTOR_SIGNALING_PATHWAY	KEGG_NOD_LIKE_RECEPTOR_SIGNALING_PATHWAY	62	0.518061	1.74379	0.00109804	0.00928344	0.00619947	3818	tags=34%, list=10%, signal=31%	6354/6347/2920/330/3576/2919/3569/10392/3606/3553/6352/9051/7205/22861/6355/834/84674/6357/5603/260434/29108
KEGG_BASAL_TRANSCRIPTION_FACTORS	KEGG_BASAL_TRANSCRIPTION_FACTORS	35	-0.603308	-1.76264	0.00128774	0.0104139	0.00695436	9915	tags=60%, list=26%, signal=44%	387332/11036/6880/2960/11037/138474/6874/6882/2962/2961/6872/2966/54457/6875/2963/2969/27097/6873/2957/9519/6877
KEGG_UBIQUITIN_MEDIATED_PROTEOLYSIS	KEGG_UBIQUITIN_MEDIATED_PROTEOLYSIS	135	-0.414962	-1.53302	0.00174048	0.0134887	0.00900775	10979	tags=62%, list=29%, signal=44%	55236/9063/51433/7337/7322/84447/25847/1161/991/7334/55120/7329/22888/23295/51434/5071/7326/64750/23221/25898/8554/10075/9817/55284/378884/8924/4734/8065/996/10401/8450/8697/8925/9320/389898/6477/51343/9039/51366/27338/3093/997/7189/83737/7324/4591/54926/64682/10055/10477/148581/7428/1642/55585/11065/57448/55294/64326/27339/26259/7317/9354/51465/23291/26091/11059/868/867/10277/10054/51588/63893/8…
KEGG_PATHWAYS_IN_CANCER	KEGG_PATHWAYS_IN_CANCER	325	-0.34111	-1.39554	0.00210545	0.0156646	0.0104608	5440	tags=28%, list=14%, signal=24%	5335/1871/5881/6789/7428/8322/675/5894/7976/7474/8074/4087/10297/324/596/7175/1387/5728/26291/1147/868/867/6654/51588/1870/3091/26060/5337/8030/83439/5747/7704/9978/6655/6772/2475/1857/2735/1612/367/2932/7475/4609/2259/5295/51684/81029/8453/3845/6258/652/4313/8031/2250/2258/5925/2257/2254/5290/1488/10000/3716/5594/2113/595/7481/6934/2033/3066/1399/2253/8503/2255/80326/5156/637/5599/64399/1019/996…
KEGG_CHRONIC_MYELOID_LEUKEMIA	KEGG_CHRONIC_MYELOID_LEUKEMIA	73	-0.470921	-1.58174	0.00238745	0.0170794	0.0114056	7663	tags=44%, list=20%, signal=35%	1027/5605/25/4089/1021/25759/5296/1871/5894/1147/868/867/6654/1870/6655/5781/4609/5295/3845/9846/5925/5290/1488/10000/5594/595/3066/53358/1399/8503/1019/613
KEGG_COLORECTAL_CANCER	KEGG_COLORECTAL_CANCER	62	-0.497977	-1.63117	0.00256104	0.0176427	0.0117818	7049	tags=39%, list=19%, signal=32%	4089/842/5601/5296/5881/5894/4087/10297/324/596/26060/83439/2932/4609/5295/3845/5290/10000/5594/595/6934/8503/5599/1630
KEGG_OXIDATIVE_PHOSPHORYLATION	KEGG_OXIDATIVE_PHOSPHORYLATION	119	-0.418439	-1.5255	0.00265738	0.0176526	0.0117884	14942	tags=68%, list=39%, signal=41%	4723/1339/4698/539/51382/64077/4694/1350/126328/514/9114/1327/4710/516/4729/515/374291/6392/4718/4725/10975/390424/10632/527/496/4702/7384/1340/170712/517/9377/1352/4716/513/528/6391/1345/537/4705/4724/1351/4706/4704/127124/6389/51606/526/1349/535/4715/9167/1347/6390/4711/4714/7381/4720/7388/7386/155066/440567/1537/644310/523/23545/7385/534/1355/4719/29796/498/506/518/4700/90423/341947/529/509/54…
KEGG_NON_SMALL_CELL_LUNG_CANCER	KEGG_NON_SMALL_CELL_LUNG_CANCER	54	-0.494277	-1.57109	0.00284599	0.017676	0.011804	7438	tags=44%, list=20%, signal=36%	5605/842/1021/5170/5296/5915/5335/1871/6789/5894/2309/6654/1870/6655/5295/3845/6258/5925/5290/10000/5594/595/8503/1019
KEGG_MTOR_SIGNALING_PATHWAY	KEGG_MTOR_SIGNALING_PATHWAY	52	-0.508014	-1.61229	0.00285097	0.017676	0.011804	11042	tags=54%, list=29%, signal=38%	1977/1978/207/673/6194/6198/51719/57521/7248/92335/9470/5170/5296/5563/1975/6196/3091/7249/2475/5295/54541/253260/5290/27330/10000/5594/8503/5228
KEGG_LEISHMANIA_INFECTION	KEGG_LEISHMANIA_INFECTION	70	0.472059	1.6138	0.00322466	0.019348	0.0129205	6374	tags=53%, list=17%, signal=44%	1378/9103/3586/2353/718/3552/3553/2215/1535/3684/653361/2212/5743/3122/4689/2209/3108/4688/5603/3689/3127/3109/3111/2214/5777/7097/3112/3119/3123/7040/3118/3115/7124/3565/3113/7042/3460
KEGG_ARACHIDONIC_ACID_METABOLISM	KEGG_ARACHIDONIC_ACID_METABOLISM	58	0.487705	1.61143	0.00366312	0.0212919	0.0142187	5305	tags=33%, list=14%, signal=28%	5320/5322/391013/8529/873/9536/240/124975/247/5743/64600/27306/6916/2053/4051/874/5730/2876/50487
KEGG_CHEMOKINE_SIGNALING_PATHWAY	KEGG_CHEMOKINE_SIGNALING_PATHWAY	188	0.364804	1.43383	0.00390931	0.0218988	0.014624	4387	tags=24%, list=12%, signal=22%	6374/9547/6354/2921/6372/6347/2920/10563/9560/3576/2919/414062/3577/2833/6351/6348/729230/10663/1233/6364/3702/6352/2826/2785/10451/653361/1234/6011/6368/6370/5197/6355/6357/3718/58191/6362/2791/7454/3579/2268/6358/7852/7409/5880/6464/5330
KEGG_ASTHMA	KEGG_ASTHMA	28	0.614054	1.74769	0.00400301	0.0218988	0.014624	6115	tags=64%, list=16%, signal=54%	6037/3586/3122/2207/3108/3127/3109/3111/3112/959/3119/3123/958/3118/3115/7124/3565/3113
KEGG_TGF_BETA_SIGNALING_PATHWAY	KEGG_TGF_BETA_SIGNALING_PATHWAY	86	-0.441528	-1.5297	0.00430716	0.0228895	0.0152856	9373	tags=50%, list=25%, signal=38%	6198/1634/4090/268/64750/9475/7046/5519/5518/9765/4089/5515/1875/3397/5308/5933/5934/6093/4087/3626/1387/5516/659/657/90/9978/3458/4609/4092/9372/4093/652/93/92/10637/5594/9241/2033/656/654/392255/83729/650
KEGG_RENAL_CELL_CARCINOMA	KEGG_RENAL_CELL_CARCINOMA	70	-0.458085	-1.5326	0.00544073	0.027814	0.0185741	7604	tags=39%, list=20%, signal=31%	5062/54583/5605/2889/5296/2549/7428/5894/1387/6654/3091/9978/6655/5781/5295/8453/3845/5063/5290/10000/5594/2113/2033/1399/8503/57144/5228
KEGG_PHOSPHATIDYLINOSITOL_SIGNALING_SYSTEM	KEGG_PHOSPHATIDYLINOSITOL_SIGNALING_SYSTEM	76	-0.451139	-1.52682	0.00553288	0.027814	0.0185741	6009	tags=36%, list=16%, signal=30%	5296/8760/84812/5335/5289/808/5331/8527/8396/5288/5728/23396/200576/5305/3628/5295/5332/3632/160851/79837/5290/5297/8503/9162/5287/23236/1607
KEGG_AXON_GUIDANCE	KEGG_AXON_GUIDANCE	129	-0.393981	-1.44492	0.0058527	0.0286474	0.0191307	7285	tags=43%, list=19%, signal=35%	6387/56896/5062/25/5921/23365/5362/4775/10507/9353/5364/219699/3985/10500/3897/5881/5533/5530/2042/6093/10725/6091/8440/1947/1944/10501/80031/3983/1943/5747/223117/23380/8482/5532/2534/9037/2932/137970/22885/2049/3845/57556/5063/9901/2048/6092/5594/57715/2770/9723/56920/6585/59277/57144/1630/2047
KEGG_PHENYLALANINE_METABOLISM	KEGG_PHENYLALANINE_METABOLISM	18	0.668591	1.71769	0.00622983	0.0297115	0.0198413	4131	tags=50%, list=11%, signal=45%	218/3242/4129/6898/5053/221/259307/9588/222
KEGG_ENDOMETRIAL_CANCER	KEGG_ENDOMETRIAL_CANCER	52	-0.483472	-1.53441	0.00683205	0.031769	0.0212153	9272	tags=52%, list=24%, signal=39%	8313/4893/8312/999/5605/842/5170/5296/5894/2309/10297/324/5728/6654/83439/6655/2932/4609/5295/3845/5290/10000/5594/595/6934/8503/29119
KEGG_HYPERTROPHIC_CARDIOMYOPATHY_HCM	KEGG_HYPERTROPHIC_CARDIOMYOPATHY_HCM	83	0.440472	1.54409	0.00811789	0.0362179	0.0241863	3774	tags=25%, list=10%, signal=23%	1674/59285/3691/3675/7137/10368/3569/3679/27091/7134/3693/4000/7169/7139/4607/3696/3674/3673/3690/93589/3694
KEGG_HISTIDINE_METABOLISM	KEGG_HISTIDINE_METABOLISM	29	0.587848	1.68033	0.00817823	0.0362179	0.0241863	2365	tags=28%, list=6%, signal=26%	218/4129/3067/10841/221/131669/501/3034
KEGG_PROSTATE_CANCER	KEGG_PROSTATE_CANCER	89	-0.423812	-1.47574	0.00887362	0.0382478	0.0255418	10695	tags=53%, list=28%, signal=38%	7184/84699/5159/207/673/90993/8517/1869/5970/4893/64764/56034/1027/5605/842/2308/5170/3326/3320/5296/1871/5894/1385/596/1387/5728/1147/6654/1870/83439/6655/2475/367/2932/5295/3845/468/5925/5290/10000/5594/595/6934/2033/8503/5156/6716
KEGG_NEUROTROPHIN_SIGNALING_PATHWAY	KEGG_NEUROTROPHIN_SIGNALING_PATHWAY	126	-0.397236	-1.45366	0.00904786	0.0382478	0.0255418	9435	tags=43%, list=25%, signal=32%	7532/4804/4793/5970/4893/4215/801/1432/10603/5605/25/4908/2889/7529/5601/25759/5170/5296/2549/7189/7533/5335/808/4915/5894/8767/27018/2309/596/9500/818/10971/6300/6654/6196/10818/6655/5781/4214/2932/5295/9252/3845/468/5290/27330/10000/57498/5594/53358/1399/8503/5599/8471
KEGG_PANCREATIC_CANCER	KEGG_PANCREATIC_CANCER	70	-0.446318	-1.49324	0.00927256	0.0383266	0.0255944	7049	tags=37%, list=19%, signal=30%	4089/842/1021/5601/5296/1871/5881/675/5894/4087/1147/1870/5337/6772/5295/3845/5925/5290/10000/3716/5594/595/8503/5599/1019/5228
KEGG_ACUTE_MYELOID_LEUKEMIA	KEGG_ACUTE_MYELOID_LEUKEMIA	57	-0.470447	-1.51381	0.00963968	0.0389778	0.0260293	3926	tags=30%, list=10%, signal=27%	1147/6654/83439/7704/6655/2475/4609/5295/3845/5290/10000/5594/595/6934/8503/3815/862
KEGG_LEUKOCYTE_TRANSENDOTHELIAL_MIGRATION	KEGG_LEUKOCYTE_TRANSENDOTHELIAL_MIGRATION	116	0.39279	1.44169	0.0104676	0.0414251	0.0276636	5786	tags=34%, list=15%, signal=29%	58498/1364/137075/4636/23562/4318/9080/50848/1365/3383/3702/9076/1535/9071/10398/3684/10451/653361/4267/1366/87/4689/4688/4478/5603/3689/7852/399/29895/7409/5880/5010/149461/10627/1496/23533/7412/10686/1536/2185
KEGG_MELANOMA	KEGG_MELANOMA	71	-0.439404	-1.46815	0.0113076	0.0438168	0.0292608	5406	tags=35%, list=14%, signal=30%	1871/5894/8074/5728/26291/1870/2259/5295/3845/2250/2258/5925/2257/2254/5290/10000/5594/595/2253/8503/2255/5156/1019/9965/8822
KEGG_TERPENOID_BACKBONE_BIOSYNTHESIS	KEGG_TERPENOID_BACKBONE_BIOSYNTHESIS	15	-0.691119	-1.67172	0.0115714	0.0439242	0.0293325	8321	tags=87%, list=22%, signal=68%	79947/10654/4598/38/91734/3158/2224/4597/23590/39/3422/3156/3157
